# Supplementary material for: Seasonal variations in leaf and branch trace elements and the influence of a 3-yr 100% rainfall exclusion on Pinus massoniana Lamb
Source: PeerJ. 2020 Sep 16;8:e9935. doi: 10.7717/peerj.9935 (PMC7501781; doi:10.7717/peerj.9935)
Supplement: Supplemental Information 1 [file peerj-08-9935-s001.xlsx]

## Sheet: Fe
leaf in the drought
		115	185	256	332	467	542	638	738	861	941	1032
	1	136.39	161.142	375.634	200.413	604.318	413.017	259.694	652.747	639.476	257.033	368.551
	2	120.138	168.529	380.483	203.235	580.161	404.673	261.819	667.367	665.494	275.681	381.196
	3	147.988	170.236	387.45	172.622	514.4	326.208	331.356	738.558	646.775	224.815	377.038
	4	113.718	174.679	388.544	173.082	607.964	332.394	339.004	745.754	621.108	198.39	361.699
	5	126.268	143.431	397.643	173.103	563.895	370.022	323.442	597.912	634.514	212.383	358.854
	6	135.174	152.564	400.388	174.754	510.101	387.262	327.586	633.303	547.067	215.256	354.927
		129.946	161.763	388.357	182.868	563.473	372.262	307.15	672.607	625.739	230.593	367.044
leaf in the control
	1	296.285	143.536	232.094	186.98	282.541	233.891	247.973	198.937	257.589	175.463	227.298
	2	275.697	143.287	190.24	166.277	270.957	230.901	207.473	207.144	267.565	174.829	259.992
	3	306.141	136.686	213.482	191.96	273.396	194.244	201.904	213.241	282.905	175.405	196.347
	4	303.005	135.305	185.908	180.808	287.014	201.391	198.559	203.257	255.828	189.754	242.05
	5	269.595	131.748	193.659	165.246	258.231	206.383	210.296	201.894	275.12	194.511	245.614
	6	259.111	132.125	168.388	153.752	256.042	206.902	214.006	190.2	292.806	191.257	241.255
		284.972	137.115	197.295	174.17	271.364	212.285	213.369	202.446	271.969	183.536	235.426
branch in the drought
	1	326.181	441.532	443.04	552.004	608.934	553.625	331.092	687.281	610.41	657.755	383.056
	2	335.886	445.888	382.243	518.173	586.824	581.85	349.109	600.694	652.967	677.474	379.336
	3	338.778	442.87	439.427	532.093	587.529	581.93	342.904	536.699	687.355	682.442	381.052
	4	310.343	408.044	446.729	583.811	556.539	520.322	292.171	581.23	631.722	696.383	382.14
	5	329.335	418.421	380.43	560.337	528.03	512.549	302.585	572.278	598.961	695	385.324
	6	323.255	417.281	376.217	592.765	683.185	505.92	316.65	569.846	556.132	684.557	386.534
		327.296	429.006	411.348	556.53	591.84	542.699	322.418	591.338	622.924	682.269	382.907
branch in the control
	1	268.783	267.066	407.436	570.336	582.156	550.816	366.283	603.331	606.419	640.719	468.61
	2	273.453	244.332	343.069	532.05	559.289	550.906	416.923	619.137	636.92	655.966	468.783
	3	297.787	272.05	381.772	527.058	585.431	549.49	361.583	650.805	637.466	646.851	468.605
	4	270.274	286.109	371.935	568.625	579.189	547.115	372.571	557.693	643.782	713.759	472.543
	5	267.866	269.109	408.98	584.841	612.293	548.049	357.303	558.77	608.514	736.019	473.079
	6	243.934	285.088	351.951	571.844	587.647	540.516	328.424	530.1	601.547	737.523	473.056
		270.35	270.626	377.524	559.126	584.334	547.815	367.181	586.639	622.441	688.473	470.779

## Sheet: Ni
leaf in the drought
		115	185	256	332	467	542	638	738	861	941	1032
	1	2.80339	3.68816	3.44846	2.38762	2.28875	2.12172	1.86404	2.97476	3.10028	2.30635	2.1903
	2	2.72288	3.28938	3.19538	2.46571	2.19444	2.62121	1.73009	2.71451	3.03612	2.31239	2.25175
	3	3.01559	3.36843	3.20615	2.35524	1.8798	2.64226	1.93328	2.45088	3.00923	2.20573	2.2317
	4	3.07458	3.56055	3.01077	2.62429	2.06886	2.66414	2.2053	2.62744	3.27091	2.19231	2.29832
	5	3.24356	3.32555	3.68845	2.29619	2.20159	2.88384	2.06489	2.74463	2.85932	2.1648	2.27827
	6	3.01288	3.26914	3.52923	2.13191	1.72309	3.24697	2.12117	2.56753	2.72914	2.10845	2.2912
		2.97881	3.41687	3.34641	2.37683	2.05942	2.69669	1.98646	2.67996	3.00083	2.215	2.25692
leaf in the control
	1	2.99763	2.88107	2.03769	3.39905	2.39141	1.81974	1.54543	2.56307	2.23185	1.87375	1.86242
	2	2.78949	2.73476	2.24231	3.19143	2.47559	2.08397	1.74148	2.54495	2.20204	1.63149	1.90188
	3	3.03864	2.64035	1.85769	2.63905	2.38131	2.64318	1.82051	2.53913	2.15345	2.02402	1.88053
	4	2.63966	2.50049	1.84692	2.4181	2.34428	2.37635	1.63707	2.81662	2.22265	2.23341	1.83426
	5	2.88136	2.75298	2.43461	2.85429	2.6128	3.08405	1.87776	2.85996	2.32947	1.97348	1.79027
	6	2.64848	3.01068	2.23154	2.86762	2.62879	2.0779	1.88565	2.83603	2.25207	1.74799	1.81808
		2.83254	2.75339	2.10846	2.89492	2.47236	2.34753	1.75131	2.69329	2.23192	1.91402	1.84791
branch in the drought
	1	3.60153	3.3522	4.09001	5.28308	3.52762	2.08508	2.05951	1.87379	2.28032	2.25805	1.33624
	2	3.23102	3.17559	4.11687	5.03308	3.74857	1.82727	2.04869	1.89088	2.31658	2.21512	1.67658
	3	3.38786	3.33186	4.11524	5.12385	4.02905	1.8037	2.07573	2.21909	2.56892	2.24396	1.70699
	4	3.37441	4.11288	3.56616	4.75923	4.21809	1.58391	1.60587	2.13281	2.54626	1.98368	1.94825
	5	3.36441	3.83763	3.63286	5.05885	4.19619	1.84158	1.6422	2.18722	2.97626	1.96892	1.97866
	6	3.27288	3.89661	3.67514	4.92154	4.13762	1.90084	1.71175	1.76798	2.67458	1.94544	2.32483
		3.37202	3.6178	3.86605	5.02994	3.97619	1.8404	1.85729	2.01196	2.56049	2.10253	1.82859
branch in the control
	1	1.93695	3.88747	3.14134	3.85923	2.59468	2.10522	2.12602	3.8112	3.38285	2.80617	3.54515
	2	2.06176	4.00868	3.19154	3.83154	2.67667	1.9537	2.28833	3.74132	3.87925	2.63667	3.65477
	3	2.16075	3.93791	3.31308	3.84462	2.80508	2.13468	2.09385	3.66088	3.31562	2.58502	3.59728
	4	1.92644	4.0526	3.30615	3.71923	2.62259	2.09259	2.36379	3.23896	3.29232	2.48408	3.34683
	5	1.84464	4.09328	3.30692	3.74308	2.56774	1.92424	2.30394	3.24448	3.52778	2.63676	3.26449
	6	2.04407	4.08514	3.18	3.75154	2.55485	1.94108	2.40871	3.08628	3.65556	2.84213	3.31151
		1.99577	4.01085	3.23984	3.79154	2.63694	2.02525	2.26411	3.46385	3.5089	2.66514	3.45334

## Sheet: Cu
leaf in the drought
		115	185	256	332	467	542	638	738	861	941	1032
	1	7.38778	8.99321	11.7524	9.61919	9.78	7.3575	7.801	12.1938	7.82513	7.43553	13.4278
	2	7.02772	8.08002	11.7859	10.6968	10.0567	8.145	7.7024	12.007	8.35469	7.56651	13.5576
	3	7.45976	8.81607	11.7924	9.67295	8.65167	9.13	8.08122	12.033	8.28594	6.59126	13.5816
	4	7.27137	9.02009	11.7385	10.1666	8.98833	8.11917	8.0015	12.1785	7.69235	6.72021	12.307
	5	7.06282	10.1446	11.7686	9.55806	8.06917	7.76445	8.10528	11.8902	7.74185	7.05208	12.4019
	6	7.28239	9.10708	11.6942	8.843	8	7.6422	7.85468	11.9659	7.83565	7.12537	12.2886
		7.24864	9.02685	11.7553	9.75942	8.92431	8.02639	7.92435	12.0447	7.95594	7.08183	12.9274
leaf in the control
	1	10.3562	9.63192	12.0511	8.05241	9.15667	6.91113	8.06269	9.82233	9.83631	6.57278	11.2981
	2	12.1304	9.41048	12.1998	9.54118	8.7675	7.07372	7.44225	10.0346	10.4256	6.64873	12.987
	3	11.3868	9.54217	12.0729	9.82234	7.34917	6.666	7.35094	10.3279	8.14343	6.65253	11.3696
	4	10.9895	9.41186	12.1351	9.47969	8.1475	6.97264	7.1847	10.4357	8.71121	7.27152	12.0424
	5	9.48963	9.44223	10.8024	9.10583	8.6825	7.17033	7.13007	10.9152	8.91923	7.28924	11.8227
	6	10.2097	9.68574	10.8358	8.74001	7.88333	7.01345	8.16415	10.5906	9.02364	7.32468	10.5162
		10.7604	9.52073	11.6828	9.12358	8.33111	6.96788	7.5558	10.3544	9.17657	6.95992	11.6727
branch in the drought
	1	19.1231	15.1194	15.6623	23.8294	19.9336	13.8442	10.6167	12.7315	19.3292	14.3352	13.4449
	2	18.7842	13.897	15.9344	24.2317	20.5376	14.7167	11.2799	12.6989	19.1962	14.4571	13.4405
	3	19.1183	12.6933	15.7192	24.6404	20.2517	14.4867	11.313	12.5419	19.1272	14.5053	13.2683
	4	19.2924	13.7842	15.4635	23.9646	20.5687	13.0817	11.601	12.4112	19.495	14.1608	13.031
	5	19.4822	13.8698	15.6185	23.0174	20.3838	13.2775	10.762	12.5591	19.2511	14.2418	13.0791
	6	19.1744	13.897	15.7035	23.8098	20.4272	13.29	11.0912	12.7476	19.2892	14.3219	13.0297
		19.1624	13.8768	15.6836	23.9156	20.3504	13.7828	11.1106	12.615	19.2813	14.3371	13.2156
branch in the control
	1	11.3375	12.4953	18.0206	17.3472	15.4625	13.94	11.7112	15.8518	20.1234	18.28	12.0056
	2	11.4517	12.4492	17.9661	17.1844	16.385	14.255	12.5198	16.3909	19.8446	17.4639	12.2757
	3	11.6118	12.4252	17.903	17.2654	16.3583	14.3192	12.661	15.6781	20.4691	17.3438	11.9829
	4	11.1835	12.5441	16.4737	17.7123	16.0633	13.5742	11.9711	15.8917	20.2646	18.0374	10.8938
	5	11.1326	12.614	16.3756	17.9536	15.9183	14.0542	11.8697	15.59	20.248	17.1351	10.4415
	6	11.1754	12.5441	16.2541	17.8617	15.8583	13.8375	12.4308	15.2972	20.0636	18.1338	10.9146
		11.3154	12.512	17.1655	17.5541	16.0076	13.9967	12.1939	15.7833	20.1689	17.7323	11.419

## Sheet: Zn
leaf in the drought
		115	185	256	332	467	542	638	738	861	941	1032
	1	41.8536	39.2247	36.4277	43.1488	44.5474	61.4614	50.5548	56.9233	48.0982	47.7765	39.9251
	2	42.1556	36.8925	36.7645	45.2558	45.1029	55.2566	56.3244	57.485	52.2884	48.268	40.0241
	3	49.8666	37.1836	33.9143	47.5204	44.4327	57.5593	50.0706	50.364	50.1285	48.7341	40.5364
	4	49.5532	40.0295	34.076	47.0927	44.5486	55.2153	51.1869	55.0615	46.8355	48.7873	40.3351
	5	42.6225	39.8959	41.5671	41.5708	45.9103	56.9337	43.1301	50.1743	43.2948	48.5698	40.3818
	6	49.2942	42.7424	42.0224	43.3624	45.5097	50.1269	49.0495	44.7673	45.0512	48.3758	40.1141
		45.891	39.3281	37.462	44.6585	45.0086	56.0922	50.0527	52.4626	47.6161	48.4186	40.2194
leaf in the control
	1	49.5041	36.9173	41.9055	54.6665	41.2067	38.2431	48.0001	45.1743	38.5391	34.2765	37.07
	2	46.2464	37.7484	42.7179	55.4376	50.3606	40.6386	44.0554	44.9599	39.78	35.3758	40.548
	3	48.7433	32.838	42.1721	44.7377	43.7998	37.3728	46.1904	46.1188	43.7591	34.7341	34.1378
	4	51.6321	33.7533	41.5552	46.6725	42.8387	45.5036	43.7079	43.1502	42.2312	35.2873	35.0414
	5	51.1242	35.1706	41.0625	51.9849	42.1129	43.2715	44.2261	41.182	39.5763	35.5698	35.1649
	6	54.5135	35.2608	41.9595	52.556	41.9008	40.9388	42.076	48.456	40.0533	34.268	35.0721
		50.2939	35.2814	41.8955	51.0092	43.7033	40.9947	44.7093	44.8402	40.6565	34.9186	36.1724
branch in the drought
	1	80.0162	70.2276	72.8413	77.0338	89.2879	68.2491	97.873	123.446	96.3951	112.305	60.7583
	2	75.0311	70.2764	72.9076	77.825	85.3184	69.8976	83.7083	118.918	90.0378	93.6966	59.4362
	3	82.6316	71.2927	73.0927	77.7407	91.1546	69.8453	94.3068	124.198	85.8875	110.878	59.1623
	4	73.1257	70.1952	78.5108	77.5656	75.5784	65.1212	90.4083	122.744	98.1223	93.6966	61.5422
	5	83.1021	70.3256	79.3367	77.725	81.7515	66.0745	95.8038	127.829	96.6236	93.6453	58.8795
	6	71.4886	69.076	79.8855	78.0939	75.7411	65.1302	89.2563	122.221	87.9857	112.126	61.2466
		77.5659	70.2323	76.0958	77.664	83.1386	67.3863	91.8928	123.226	92.5086	102.724	60.1709
branch in the control
	1	58.3208	61.7643	73.2832	75.3718	77.2939	75.7352	57.4933	98.333	89.8243	91.5855	54.2119
	2	59.5454	61.6091	62.149	81.1732	65.8391	72.4228	62.732	90.2833	87.6346	108.746	43.3165
	3	55.4795	53.6096	75.88	75.3346	83.9409	71.4933	65.3993	92.3906	88.9914	102.238	49.7642
	4	55.5655	54.055	68.5358	79.9836	71.3794	76.6192	72.8223	86.5814	84.6189	108.927	49.6649
	5	58.4314	62.3939	78.6513	73.7474	75.6608	75.802	60.1874	93.9883	82.067	119.023	48.1643
	6	54.3532	53.7567	68.0641	79.8666	76.7423	72.5903	63.4386	88.1814	84.1493	98.8158	50.5712
		56.9493	57.8648	71.0939	77.5795	75.1427	74.1105	63.6788	91.6263	86.2142	104.889	49.2822

## Sheet: Cd
leaf in the drought
		115	185	256	332	467	542	638	738	861	941	1032
	1	0.290486	0.300926	0.404378	0.419905	0.342723	0.369234	0.296879	0.390158	0.40135	0.37583	0.293112
	2	0.293522	0.313889	0.412154	0.431779	0.355975	0.287388	0.278044	0.378498	0.39983	0.36692	0.262335
	3	0.285425	0.327778	0.337846	0.412349	0.329241	0.277158	0.370426	0.415271	0.38766	0.386452	0.274792
	4	0.302632	0.318519	0.324021	0.422064	0.31529	0.347842	0.376704	0.410787	0.36985	0.379443	0.291646
	5	0.304656	0.255556	0.350806	0.354059	0.300878	0.360863	0.275353	0.391952	0.34581	0.397262	0.290914
	6	0.293522	0.250926	0.346486	0.338946	0.323899	0.279576	0.295085	0.412581	0.35695	0.345833	0.264533
		0.29504	0.294599	0.362615	0.396517	0.328001	0.320344	0.315415	0.399874	0.376908	0.37529	0.279555
leaf in the control
	1	0.410874	0.328704	0.345138	0.525345	0.399933	0.321973	0.442621	0.518992	0.40516	0.363459	0.36342
	2	0.446154	0.29537	0.354643	0.453411	0.360394	0.323811	0.432755	0.514661	0.38564	0.365924	0.42147
	3	0.439069	0.269444	0.382396	0.476727	0.408988	0.351928	0.412431	0.556343	0.38671	0.356864	0.302511
	4	0.439474	0.311111	0.3703	0.495078	0.393408	0.34248	0.494759	0.520673	0.41263	0.342208	0.372946
	5	0.454656	0.282407	0.355127	0.45013	0.447827	0.350056	0.435901	0.445656	0.40698	0.356131	0.331739
	6	0.468668	0.336111	0.37068	0.459845	0.380632	0.361047	0.448457	0.475566	0.41256	0.337079	0.36342
		0.443149	0.303858	0.363047	0.476756	0.39853	0.341883	0.444487	0.505315	0.401613	0.353611	0.359251
branch in the drought
	1	1.07623	1.2581	1.3213	1.43606	1.40661	1.59708	1.292	1.50144	1.36259	1.33157	1.02955
	2	1.10634	1.24696	1.23148	1.28399	1.46813	1.88795	1.30637	1.31757	1.49651	1.51787	1.02882
	3	1.1115	1.23279	1.24444	1.25893	1.48541	1.72656	1.29791	1.48081	1.47543	1.50268	1.03395
	4	1.23887	1.30567	1.31018	1.45334	1.42586	1.4212	1.32497	1.50413	1.46547	1.32834	1.02516
	5	1.20467	1.32591	1.34167	1.44124	1.4569	1.56492	1.31905	1.31219	1.39651	1.53083	1.01636
	6	1.19587	1.27429	1.2537	1.25979	1.4199	1.57236	1.4053	1.31936	1.40653	1.51787	1.0149
		1.15558	1.27395	1.2838	1.35556	1.4438	1.62835	1.32427	1.40591	1.43384	1.45486	1.02479
branch in the control
	1	1.11943	1.54352	1.42874	1.52333	1.84427	1.86756	1.37541	1.61339	1.71298	1.59323	1.46922
	2	1.20445	1.33519	1.42183	1.34447	1.91823	1.8564	1.40951	1.45814	2.01237	1.61186	1.46409
	3	1.12348	1.3037	1.41406	1.32546	1.96126	1.85826	1.65899	1.49072	2.25125	1.59566	1.4509
	4	1.11943	1.54722	1.44942	1.51901	1.81272	2.07031	1.40145	1.61542	1.84623	1.58999	1.55496
	5	1.22267	1.54444	1.45461	1.55011	1.6762	2.06008	1.34988	1.86565	1.90213	1.56164	1.55056
	6	1.21862	1.3213	1.42696	1.3462	1.72574	1.86756	1.18374	1.72869	1.84538	1.5746	1.46996
		1.16802	1.43256	1.4326	1.43476	1.82307	1.93003	1.3965	1.62867	1.92839	1.58783	1.49328

## Sheet: Cr
leaf in the drought
	115	185	256	332	467	542	638	738	861	941	1032
1	3.40959	4.81962	5.4516	2.56401	4.81471	3.95	2.9792	4.571	2.63333	3.02898	2.87329
2	3.5	4.92695	5.669	2.54325	4.60118	4.535	2.58222	4.14751	2.73333	2.5427	2.96288
3	3.43041	4.39229	5.641	2.58478	5.45471	2.64012	2.69873	4.32581	2.50833	2.19273	2.98848
4	3.37703	5.65075	5.3745	3.12457	5.16824	3.77882	2.63423	4.31756	2.325	2.41358	2.91169
5	3.30003	5.08816	5.5077	3.15571	4.65353	3.60422	2.369	4.9071	2.475	1.92342	2.99488
6	3.28689	5.05793	5.5147	3.13495	4.83	4.12797	2.70202	4.98327	2.5333	2.15364	3.07807
	3.38399	4.98928	5.52642	2.85121	4.9204	3.77269	2.6609	4.54204	2.53472	2.37584	2.96822
leaf in the control
1	3.45419	4.45617	3.6199	3.2481	3.5706	4.45369	1.63672	1.45405	2.15833	2.27176	1.66382
2	4.20946	4.10861	4.655	3.3	3.98118	4.27995	1.65823	1.48834	2.175	2.29096	1.73422
3	4.0073	4.14106	3.5583	3.25848	3.23529	4.26953	1.65388	1.50206	2.29167	2.28456	1.72142
4	4.1453	4.564	6.662	3.34152	3.03235	4.39578	1.62865	1.45405	2.1333	2.46374	1.79821
5	4.7068	4.7733	6.838	3.41419	3.27059	3.06588	1.50179	1.48148	2.11667	2.52773	1.843
6	4.2885	5.0486	5.641	3.4395	3.11471	3.25847	1.67383	1.47462	2.06667	2.45734	1.79181
	4.13526	4.51529	5.16237	3.33363	3.36745	3.95388	1.62552	1.47577	2.15694	2.38268	1.75875
branch in the drought
1	2.75087	7.17568	13.4104	14.9165	8.2076	5.16471	4	11.9479	4.90833	2.88251	1.68942
2	2.54325	7.30743	13.2275	14.3216	8.7162	4.96176	4.09499	12.0645	5.29167	2.82545	1.70862
3	2.26298	7.31757	13.1318	14.0815	9.2193	5.12941	4.04749	12.0233	4.9	2.92673	1.69582
4	3.22837	8.41216	12.7833	13.9599	8.04828	4.81176	4.21372	11.6735	4.925	2.87943	1.55503
5	3.40484	8.40203	12.7224	14.0047	8.14828	4.82059	4.28496	11.7078	4.89167	3.02872	1.81741
6	3.17647	8.35135	13.2234	14.3529	8.30862	4.79412	4.15831	11.6392	5.10833	2.88871	1.70222
	2.89446	7.8277	13.0831	14.2729	8.44138	4.94706	4.13324	11.8427	5.00417	2.90526	1.69475
branch in the control
1	1.57108	6.875	11.9776	15.1304	4.42059	4.27941	3.91304	4.17892	4.275	3.59276	2.03737
2	1.67162	7.3742	12.1248	16.1108	4.44706	4.35882	3.9956	4.02845	4.23333	3.72647	2.13097
3	1.61149	7.612	11.9355	15.1024	4.5	4.30588	4.00385	4.29543	4.4	3.58019	1.90776
4	1.5	7.2758	11.3745	15.0323	4.14706	4.36765	3.22785	4.46725	4.15833	3.80439	1.87022
5	1.61189	7.133	11.4095	16.2651	4.22647	4.39412	3.28564	4.14249	4.34167	3.8795	1.77662
6	1.58122	7.1834	11.3955	16.1879	4.24412	4.43824	3.29389	4.00028	4.19167	3.90324	1.77345
	1.59122	7.24223	11.7029	15.6381	4.33088	4.35735	3.61998	4.18547	4.26667	3.74776	1.91606
